# Supplementary material
Source: MDPI journal article supplement (https://www.mdpi.com/1996-1073/16/1/256)
Supplement: s1 [file s1]

**Table S3-1.** Machine learning models' hyperparameter tuning range

| Hyperparameter Name      | Range                                                                                    | LightGBM | XgBoost | CatBoost |
|--------------------------|------------------------------------------------------------------------------------------|----------|---------|----------|
| max_depth                | 2~15                                                                                     | √        | √       | √        |
| n_estimators(iterations) | 40~640                                                                                   | √        | √       | √        |
| learning_rate            | [0.01, 0.02, 0.03,<br>0.04, 0.05, 0.1, 0.15,<br>0.2, 0.25, 0.3, 0.35,<br>0.4, 0.45, 0.5] | √        | √       | √        |
| gamma                    | [0.0, 0.1, 0.2, 0.3, 0.4]                                                                |          | √       |          |
| reg_alpha                | [0.0001, 0.001, 0.01,<br>0.1, 1,10]                                                      | √        | √       |          |
| reg_lambda (l2_leaf_reg) | [0.0001, 0.001, 0.01,<br>0.1, 1,10]                                                      |          | √       | √        |
| min_child_weight         | 1~8                                                                                      | √        | √       |          |
| colsample_bytree         | [0.3, 0.4, 0.5, 0.6, 0.7,<br>0.8, 0.9, 1]                                                |          | √       |          |
| subsample                | [0.6, 0.7, 0.8, 0.9, 1]                                                                  |          |         |          |
| num_leaves               | 40~640                                                                                   | √        |         |          |
| min_child_samples        | 2~15                                                                                     | √        |         |          |
| bagging_fraction         | [0.0001, 0.001, 0.01,<br>0.1, 1]                                                         | √        |         |          |

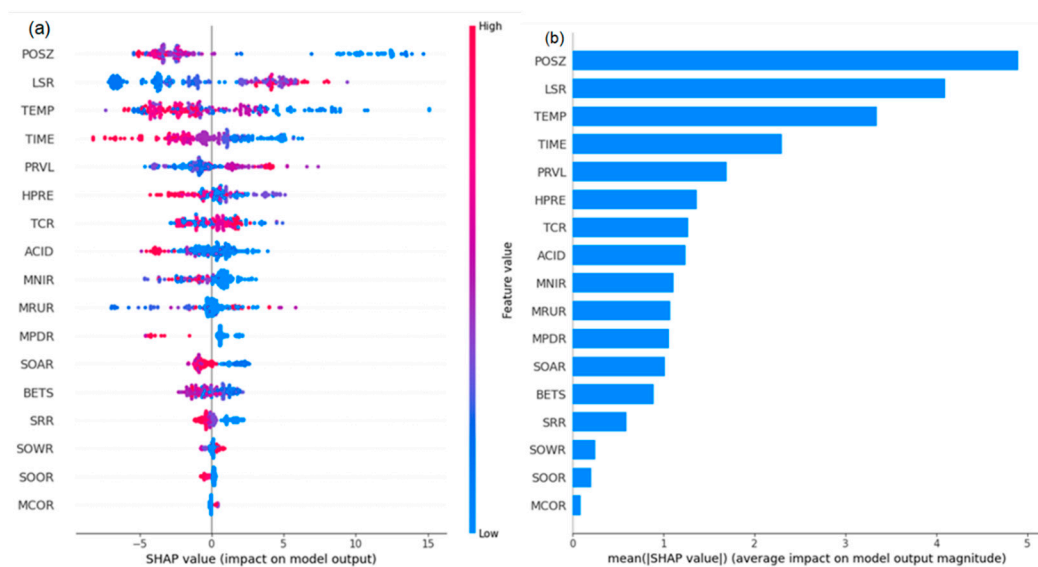

**Figure S3-1.** SHAP value (left) and feature importance (right) of LightGBM prediction on solid yield

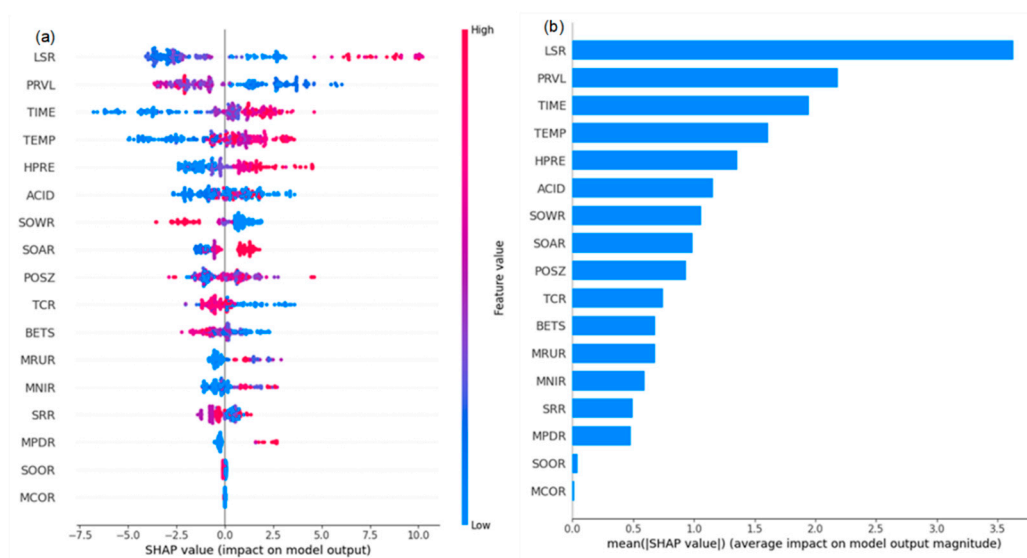

**Figure S3-2.** SHAP value (a) and feature importance (b) of LightGBM prediction on aromatics

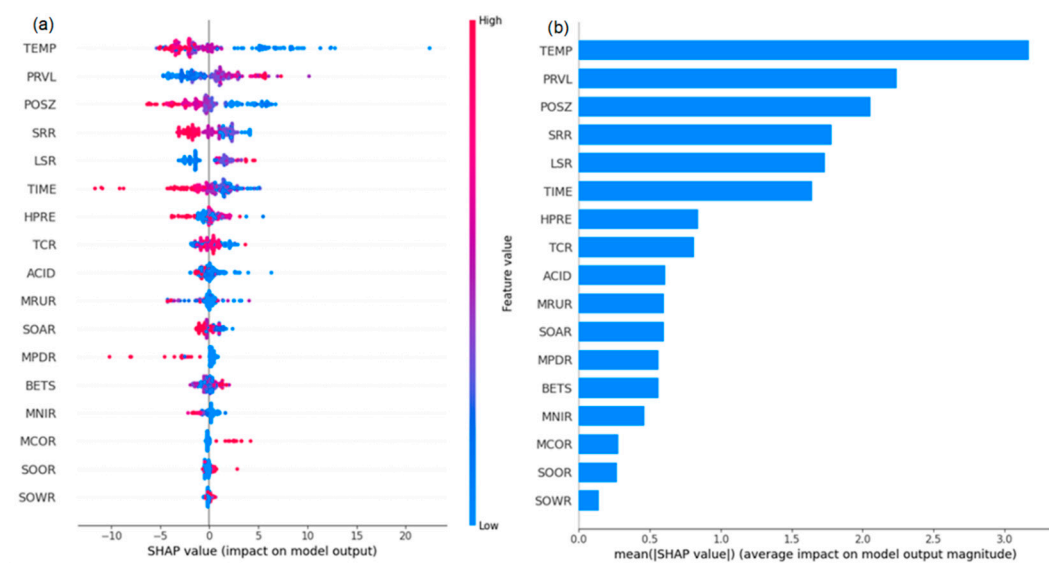

**Figure S3-3.** SHAP value (a) and feature importance (b) of CatBoost prediction on solid yield

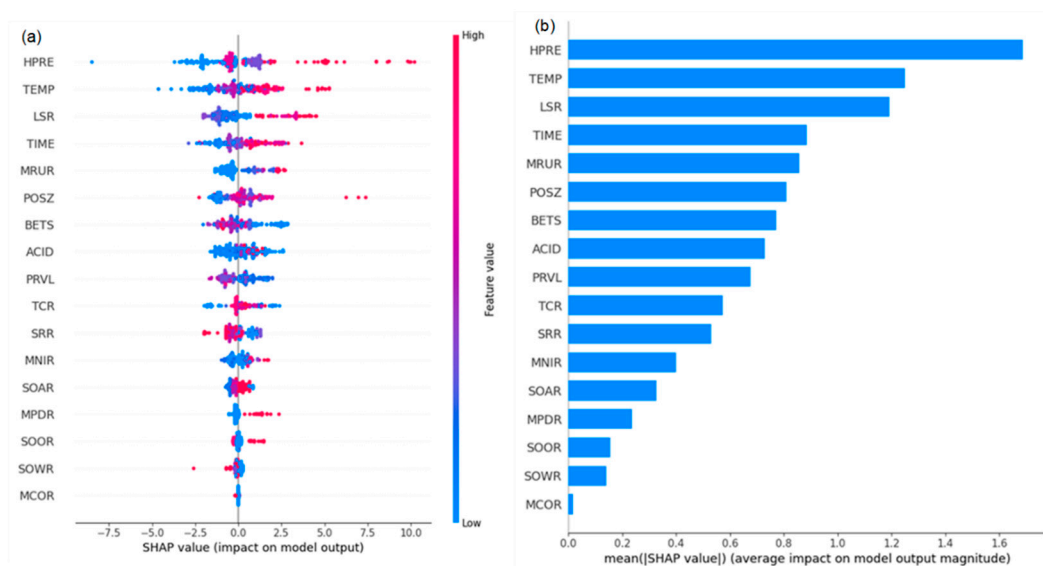

**Figure S3-4.** SHAP value (a) and feature importance (b) of CatBoost prediction on aromatics
